# Supplementary material
Source: publisher figshare collection journal article supplement (https://diabetesjournals.figshare.com/ndownloader/files/25640654)
Supplement: Supplementary file 1 [file 25640654]

## Online-only Supplemental Material

**Supplemental Figure S1:** Distribution of categories of HbA1c, systolic and diastolic blood pressures, and total cholesterol among US adults with newly diagnosed diabetes (diagnosed within the past 2 years), NHANES 1988-2018

**Supplemental Table S1:** Trends in prevalence of complications (extended outcomes) among US adults with newly diagnosed diabetes (diagnosed within the past 2 years), NHANES 1988-2018

**Supplemental Table S2:** Unadjusted and adjusted odds ratios (95% confidence intervals) for albuminuria among US adults with newly diagnosed diabetes (diagnosed within the past 2 years), NHANES 1988-2018

**Supplemental Table S3:** Age-sex-race/ethnicity adjusted trends in the prevalence, treatment, and control of vascular risk factors among US adults with newly diagnosed diabetes (diagnosed within the past 2 years), NHANES 1988-2018

**Supplemental Table S4:** Age-sex-race/ethnicity adjusted trends in the prevalence of complications (extended outcomes) among US adults with newly diagnosed diabetes (diagnosed within the past 2 years), NHANES 1988-2018

**Supplemental Table S5:** Trends in the prevalence, treatment, and control of risk factors among US adults with newly diagnosed diabetes (diagnosed within the past year), NHANES 1988-2018

**Supplemental Table S6:** Trends in the prevalence of complications (extended outcomes) among US adults with newly diagnosed diabetes (diagnosed within the past year), NHANES 1988-2018

Supplemental Figure S1: Distribution of categories of HbA1c, systolic and diastolic blood pressures, and total cholesterol among US adults with newly diagnosed diabetes (diagnosed within the past 2 years), NHANES 1988-2018

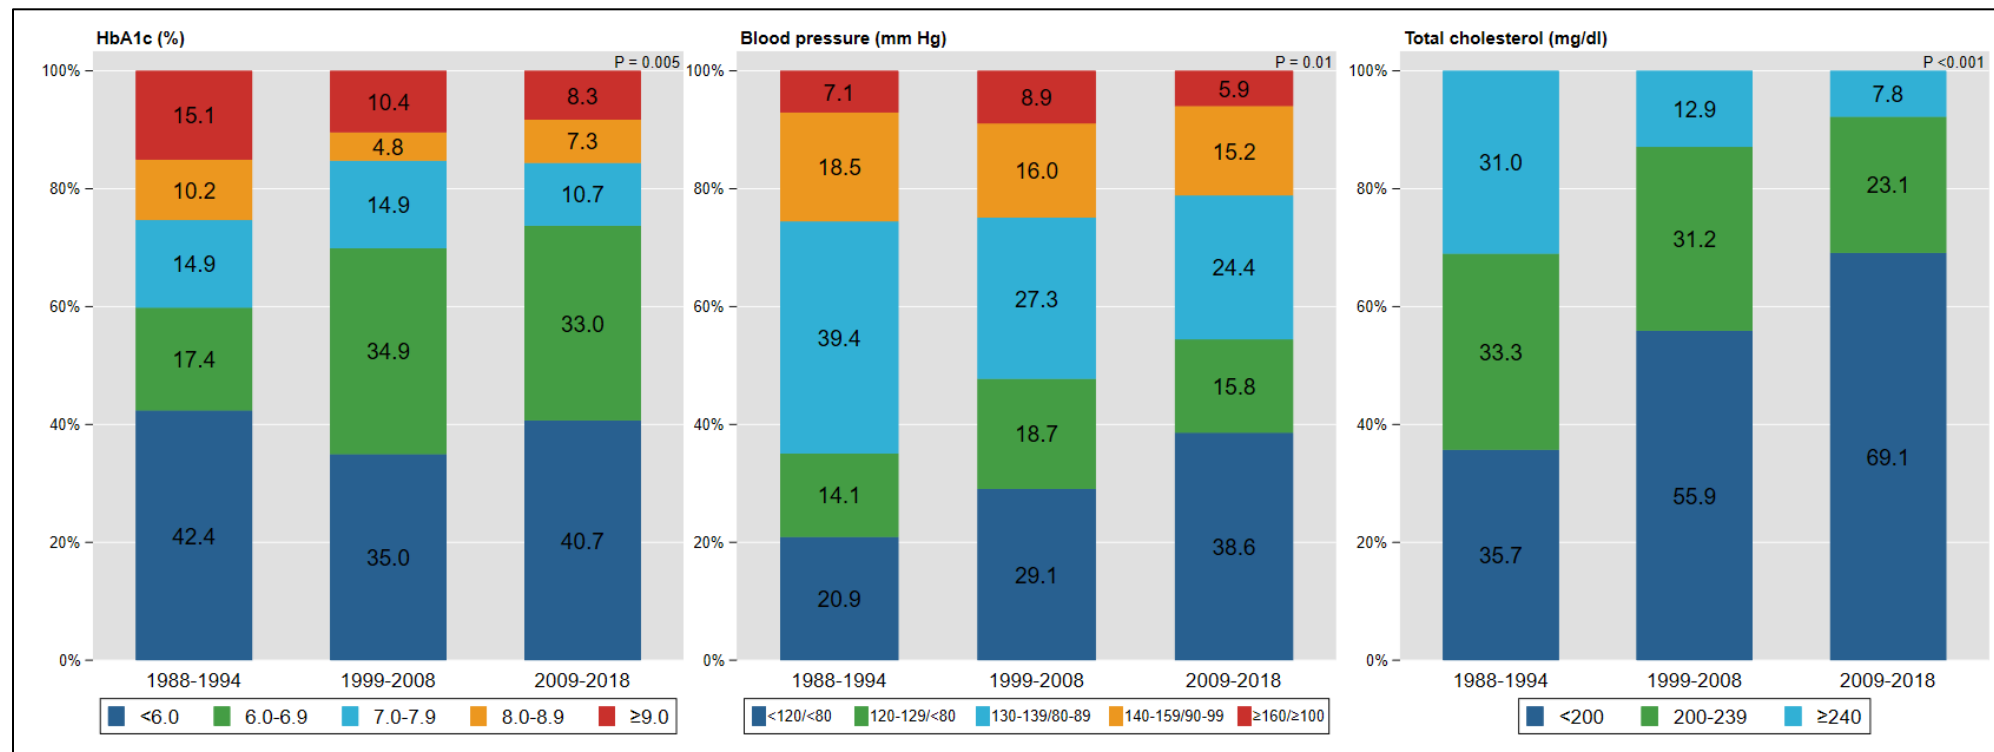

Note: Estimates are weighted percentages based on the National Health and Nutrition Examination Survey (NHANES). P-values are from chi-square tests. HbA1c categories in SI units are <6.0% (<42mmol/mol), 6.0-6.9% (42-52 mmol/mol), 7.0-7.9% (53-63 mmol/mol), 8.0-8.9% (64-74 mmol/mol), ≥9.0% (≥75 mmol/mol).

Supplemental Table S1: Trends in prevalence of complications (extended outcomes) among US adults with newly diagnosed diabetes (diagnosed within the past 2 years), NHANES 1988-2018

|                                                                           | 1988-1994        | 1999-2008        | 2009-2018        | P for trend |
|---------------------------------------------------------------------------|------------------|------------------|------------------|-------------|
| Any chronic kidney disease                                                | 40.4 (31.8-49.5) | 28.0 (23.8-32.7) | 25.5 (21.7-29.7) | 0.003       |
| Percentage of chronic kidney cases treated with ACE-I/ARB                 | 13.6 (6.7-25.4)  | 50.7 (39.2-62.1) | 59.9 (50.6-68.5) | <0.001      |
| Albuminuria (albumin-to-creatinine ratio $\geq 30$ mg/g)                  | 38.9 (30.7-47.9) | 21.0 (17.2-25.3) | 18.7 (15.6-22.3) | <0.001      |
| Percentage of albuminuria cases treated with ACE-I/ARB                    | 12.4 (5.8-24.7)  | 43.5 (32.2-55.6) | 59.0 (48.5-68.8) | <0.001      |
| Reduced eGFR (eGFR < 60 ml/mi/1.73 m <sup>2</sup> )                       | 7.5 (4.4-12.5)   | 10.2 (7.4-13.9)  | 9.9 (7.3-13.3)   | 0.30        |
| Percentage of reduced eGFR cases treated with ACE-I/ARB                   | 27.5 (9.7-57.2)  | 68.3 (48.6-83.1) | 65.0 (48.3-78.6) | 0.02        |
| Retinopathy ( $\geq 1$ retinal microaneurysms or blot hemorrhages) *      | 13.2 (6.7-24.3)  | 12.1 (6.8-20.4)  | -                | 0.86        |
| Any lower extremity disease <sup>†</sup>                                  | -                | 23.6 (17.8-30.5) | -                | -           |
| Peripheral neuropathy ( $\geq 1$ insensate area via monofilament testing) | -                | 14.5 (9.8-21.1)  | -                | -           |
| Peripheral artery disease (ankle-brachial-index < 0.9)                    | -                | 9.2 (5.7-14.7)   | -                | -           |
| Self-reported foot or leg ulcer                                           | -                | 6.3 (2.5-15.3)   | -                | -           |
| Any self-reported cardiovascular disease                                  | 19.0 (13.5-26.1) | 14.8 (11.6-18.6) | 16.5 (12.6-21.3) | 0.64        |
| History of congestive heart failure                                       | 6.9 (3.9-11.8)   | 6.4 (4.3-9.5)    | 5.1 (3.2-7.8)    | 0.35        |
| History of stroke                                                         | 6.8 (3.7-12.2)   | 6.4 (4.4-9.1)    | 6.4 (4.5-9.1)    | 0.95        |
| History of heart attack                                                   | 10.2 (6.1-16.4)  | 6.6 (4.8-9.1)    | 9.4 (6.3-13.7)   | 0.90        |

Abbreviations: NHANES, National Health and Nutrition Examination Survey.  
Figures are presented as percentages (with 95% confidence intervals).  
\* Retinopathy data were only available for adults aged 40+ during the 1988-1994 and 2005-2008 NHANES survey cycles.  
<sup>†</sup> Lower- extremity disease data were only available for adults aged 40+ during the 1999-2004 NHANES survey cycles.

Supplemental Table S2: Unadjusted and adjusted odds ratios (95% confidence intervals) for albuminuria among US adults with newly diagnosed diabetes (diagnosed within the past 2 years), NHANES 1988-2018\*

|                                                 | 1988-1994 (ref)  | 1999-2008        | 2009-2018 | P for trend |
|-------------------------------------------------|------------------|------------------|-----------|-------------|
| Model 1: Unadjusted                             | 3.13 (1.99-4.92) | 1.28 (0.89-1.83) | 1 (ref)   | <0.001      |
| Model 2: +Age, sex, race/ethnicity <sup>†</sup> | 3.31 (2.15-5.10) | 1.31 (0.91-1.90) | 1 (ref)   | <0.001      |
| Model 3: +Education <sup>‡</sup>                | 2.98 (1.93-4.62) | 1.29 (0.88-1.90) | 1 (ref)   | <0.001      |
| Model 4: +HbA1c <sup>§</sup>                    | 2.80 (1.79-4.37) | 1.27 (0.86-1.87) | 1 (ref)   | <0.001      |
| Model 5: +Blood pressure <sup>  </sup>          | 2.62 (1.56-4.39) | 1.16 (0.80-1.68) | 1 (ref)   | <0.001      |
| Model 6: +Total cholesterol <sup>¶</sup>        | 2.27 (1.34-3.86) | 1.13 (0.78-1.64) | 1 (ref)   | 0.005       |
| Model 7: +Weight status <sup>#</sup>            | 2.60 (1.48-4.55) | 1.20 (0.83-1.74) | 1 (ref)   | 0.002       |

Abbreviations: NHANES, National Health and Nutrition Examination Survey; NH, Non-Hispanic; BMI, Body mass index

Figures are presented as odds ratios (with 95% confidence intervals).

\* Albuminuria was defined as an albumin-to-creatinine ratio  $\geq 30$  mg/g.

<sup>†</sup> Model 2: +age (20-44, 45-64, 65+), sex (male/female), and race/ethnicity (Non-Hispanic White, Non-Hispanic Black, Mexican American, other)

<sup>‡</sup> Model 3: Model 2 + education (high school or less, some college, college graduate)

<sup>§</sup> Model 4: Model 3 + HbA1c categories (<6.0%, 6.0-6.9%, 7.0-7.9%, 8.0-8.9%,  $\geq 9.0\%$ ) [ $<42$ mmol/mol, 42-52 mmol/mol, 53-63 mmol/mol, 64-74 mmol/mol,  $\geq 75$  mmol/mol]

<sup>||</sup> Model 5: Model 4 + blood pressure categories (<120/<80 mm Hg, 120-129 & <80 mm Hg, 130-139/80-89 mm Hg, 140-159/90-99 mm Hg,  $\geq 160/\geq 100$  mm Hg)

<sup>¶</sup> Model 6: Model 5 + total cholesterol categories (<200 mg/dl, 200-239 mg/dl,  $\geq 240$  mg/dl)

<sup>#</sup> Model 7: Model 6 + weight status groups (normal, BMI < 25 kg/m<sup>2</sup>; overweight, BMI 25-29.9 kg/m<sup>2</sup>; obese, BMI  $\geq 30$  kg/m<sup>2</sup>)

Supplemental Table S3: Age-sex-race/ethnicity adjusted trends in the prevalence, treatment, and control of vascular risk factors among US adults with newly diagnosed diabetes (diagnosed within the past 2 years), NHANES 1988-2018

|                                                            | 1988-1994           | 1999-2008           | 2009-2018           | P for trend |
|------------------------------------------------------------|---------------------|---------------------|---------------------|-------------|
| <b>Glucose control</b>                                     |                     |                     |                     |             |
| HbA1c, %-points, median                                    | 6.3 (5.7-6.8)       | 6.2 (6.1-6.4)       | 6.2 (6.0-6.4)       | 0.60        |
| HbA1c, %-points, mean                                      | 7.0 (6.6-7.3)       | 6.8 (6.5-7.1)       | 6.7 (6.5-6.8)       | 0.03        |
| Treated, %                                                 |                     |                     |                     |             |
| Insulin or oral medication use                             | 73.1 (65.7-79.4)    | 73.1 (67.2-78.3)    | 72.6 (67.1-77.6)    | 0.78        |
| Oral medication use only                                   | 60.5 (52.5-67.9)    | 66.9 (60.9-72.3)    | 64.7 (58.7-70.4)    | 0.44        |
| Any insulin use                                            | 12.6 (8.8-17.8)     | 6.3 (3.5-11.0)      | 7.9 (5.8-10.7)      | 0.03        |
| HbA1c <7.0 %-points (<53 mmol/mol), %                      | 59.5 (49.7-68.7)    | 70.3 (63.5-76.3)    | 73.8 (68.9-78.1)    | 0.002       |
| <b>Blood pressure</b>                                      |                     |                     |                     |             |
| Systolic blood pressure, mm Hg median                      | 129.4 (127.6-131.2) | 127.9 (126.1-129.6) | 124.3 (122.2-126.4) | 0.001       |
| Diastolic blood pressure, mm Hg, median                    | 76.4 (74.9-77.9)    | 72.4 (71.1-73.7)    | 72.4 (70.8-74.0)    | <0.001      |
| Systolic blood pressure, mm Hg, mean                       | 130.5 (128.1-132.9) | 129.1 (126.9-131.3) | 125.6 (123.9-127.2) | 0.002       |
| Diastolic blood pressure, mm Hg, mean                      | 77.4 (76.0-78.8)    | 71.8 (70.0-73.7)    | 72.3 (70.9-73.8)    | <0.001      |
| Treated, %                                                 | 39.8 (30.8-49.4)    | 51.6 (46.0-57.2)    | 54.9 (49.1-60.5)    | 0.01        |
| Hypertension (≥140/90 mm Hg or med use), %                 | 49.2 (41.1-57.3)    | 59.5 (53.5-65.3)    | 60.9 (55.1-66.4)    | 0.03        |
| Treated*                                                   | 81.3 (69.7-89.2)    | 86.4 (80.6-90.6)    | 90.0 (85.8-93.0)    | 0.08        |
| Treated and controlled (blood pressure<140/90 mm Hg) *     | 47.2 (36.1-58.6)    | 58.9 (51.1-66.2)    | 66.3 (59.4-72.6)    | 0.01        |
| Hypertension (≥130/80 mm Hg or med use), %                 | 71.8 (62.5-79.6)    | 71.2 (65.5-76.3)    | 70.5 (64.5-75.9)    | 0.87        |
| Treated*                                                   | 55.8 (44.7-66.4)    | 72.1 (65.7-77.6)    | 77.4 (71.7-82.2)    | 0.001       |
| Treated and controlled (blood pressure<130/80 mm Hg) *     | 9.2 (4.9-16.8)      | 28.5 (23.0-34.7)    | 36.2 (30.6-42.3)    | <0.001      |
| <b>Lipids</b>                                              |                     |                     |                     |             |
| Total cholesterol, mg/dl, median                           | 210.7 (200.6-220.9) | 192.7 (185.2-200.3) | 180.2 (175.0-185.5) | <0.001      |
| Total cholesterol, mg/dl, mean                             | 219.0 (209.9-228.1) | 198.4 (192.4-204.4) | 182.8 (178.5-187.1) | <0.001      |
| Treated, %                                                 | 14.4 (8.4-23.6)     | 35.1 (29.5-41.2)    | 42.9 (37.2-48.7)    | <0.001      |
| Hyperlipidemia (total cholesterol≥240 mg/dl or med use), % | 39.9 (30.2-50.5)    | 45.8 (40.0-51.7)    | 49.9 (44.5-55.4)    | 0.08        |
| Treated†                                                   | 33.6 (21.1-48.8)    | 72.2 (64.6-78.6)    | 84.5 (79.4-88.5)    | <0.001      |
| Treated and controlled (total cholesterol <240 mg/dl) †    | 18.0 (8.8-33.2)     | 44.8 (35.5-54.5)    | 68.9 (62.3-74.9)    | <0.001      |
| Hyperlipidemia (total cholesterol≥200 mg/dl or med use), % | 71.3 (65.3-76.7)    | 65.6 (60.5-70.4)    | 66.3 (61.4-70.8)    | 0.16        |
| Treated†                                                   | 19.2 (11.3-30.7)    | 51.4 (44.0-58.7)    | 63.7 (56.7-70.2)    | <0.001      |
| Treated and controlled (total cholesterol <200 mg/dl) †    | 9.7 (4.5-20.0)      | 29.7 (22.2-38.5)    | 50.4 (43.7-57.1)    | <0.001      |
| <b>All three risk factors controlled</b>                   |                     |                     |                     |             |

|                                                                                                                                                                                                                                                 |                  |                  |                  |        |
|-------------------------------------------------------------------------------------------------------------------------------------------------------------------------------------------------------------------------------------------------|------------------|------------------|------------------|--------|
| HbA1c<7.0% (<53 mmol/mol), blood pressure <130/80 mm Hg, total cholesterol <200 mg/dl, %                                                                                                                                                        | 9.4 (6.1-14.3)   | 18.2 (13.6-23.9) | 32.8 (26.7-39.5) | <0.001 |
| HbA1c<7.0% (<53 mmol/mol), blood pressure <140/90 mm Hg, total cholesterol <240 mg/dl, %                                                                                                                                                        | 31.4 (23.5-40.6) | 48 (41.4-54.8)   | 56.3 (51.3-61.2) | <0.001 |
| Abbreviations: NHANES, National Health and Nutrition Examination Survey.                                                                                                                                                                        |                  |                  |                  |        |
| Predictive margins (with 95% confidence intervals) were estimated using regression models that controlled for age (20-44, 45-64, 65+), sex (male/female), and race/ethnicity (Non-Hispanic White, Non-Hispanic Black, Mexican American, other). |                  |                  |                  |        |
| * Computed for those with hypertension.                                                                                                                                                                                                         |                  |                  |                  |        |
| ‡ Computed for those with hyperlipidemia.                                                                                                                                                                                                       |                  |                  |                  |        |

Supplemental Table S4: Age-sex-race/ethnicity adjusted trends in the prevalence of complications (extended outcomes) among US adults with newly diagnosed diabetes (diagnosed within the past 2 years), NHANES 1988-2018

|                                                                                 | 1988-1994        | 1999-2008        | 2009-2018        | P for trend |
|---------------------------------------------------------------------------------|------------------|------------------|------------------|-------------|
| Any chronic kidney disease                                                      | 40.4 (32.3-49.1) | 28.2 (24.1-32.8) | 25.3 (21.4-29.6) | 0.002       |
| Percentage of chronic kidney cases treated with ACE-I/ARB                       | 14.2 (7.4-25.4)  | 50.2 (38.7-61.7) | 58.1 (49.3-66.5) | <0.001      |
| Albuminuria (albumin-to-creatinine ratio $\geq$ 30 mg/g)                        | 39.0 (31.1-47.6) | 21.0 (17.2-25.3) | 18.6 (15.5-22.2) | <0.001      |
| Percentage of albuminuria cases treated with ACE-I/ARB                          | 12.6 (6.2-24.0)  | 44.3 (32.2-57.0) | 57.8 (48.0-66.9) | <0.001      |
| Reduced eGFR (eGFR<60 ml/mi/1.73 m <sup>2</sup> )                               | 7.4 (4.9-11.1)   | 10.3 (7.8-13.6)  | 9.9 (7.3-13.4)   | 0.24        |
| Percentage of reduced eGFR cases treated with ACE-I/ARB*                        | 33.0 (13.2-61.4) | 68.5 (50.3-82.3) | 60.2 (42.5-75.5) | 0.03        |
| Retinopathy ( $\geq$ 1 retinal microaneurysms or blot hemorrhages) <sup>†</sup> | 13.1 (7.1-22.9)  | 12.5 (6.7-22.0)  |                  | 0.94        |
| Any lower extremity disease <sup>‡</sup>                                        | -                | 23.6 (17.8-30.5) | -                | -           |
| Peripheral neuropathy ( $\geq$ 1 insensate area via monofilament testing)       | -                | 14.5 (9.8-21.1)  | -                | -           |
| Peripheral artery disease (ankle-brachial-index<0.9)                            | -                | 9.2 (5.7-14.7)   | -                | -           |
| Self-reported foot or leg ulcer                                                 | -                | 6.3 (2.5-15.3)   | -                | -           |
| Any self-reported cardiovascular disease                                        | 19.3 (13.7-26.5) | 15.1 (12.3-18.5) | 16.0 (12.1-20.9) | 0.51        |
| History of congestive heart failure                                             | 6.9 (4.2-11.3)   | 6.5 (4.5-9.5)    | 5.0 (3.2-7.6)    | 0.27        |
| History of stroke                                                               | 6.9 (3.8-12.2)   | 6.6 (4.6-9.2)    | 6.2 (4.3-8.8)    | 0.83        |
| History of heart attack                                                         | 10.2 (6.1-16.8)  | 6.9 (5.1-9.2)    | 9.1 (6-13.5)     | 0.81        |

Abbreviations: NHANES, National Health and Nutrition Examination Survey.

Predictive margins (with 95% confidence intervals) were estimated using logistic regression models that controlled for age (20-44, 45-64, 65+), sex (male/female), and race/ethnicity (Non-Hispanic White, Non-Hispanic Black, Mexican American, other) unless otherwise noted.

\* Age was entered as a linear (rather than categorical) term in the logistic regression model due to empty cells.

<sup>†</sup> Retinopathy data were only available for adults aged 40+ during the 1988-1994 and 2005-2008 NHANES survey cycles.

<sup>‡</sup> Lower- extremity disease data were only available for adults aged 40+ during the 1999-2004 NHANES survey cycles and not adjusted.

Supplemental Table S5: Trends in the prevalence, treatment, and control of risk factors among US adults with newly diagnosed diabetes (diagnosed within the past year), NHANES 1988-2018

|                                                            | 1988-1994           | 1999-2008           | 2009-2018           | P for trend |
|------------------------------------------------------------|---------------------|---------------------|---------------------|-------------|
| <b>Glucose control</b>                                     |                     |                     |                     |             |
| HbA1c, %-points, median                                    | 6.3 (5.6-8.1)       | 6.2 (5.7-7.1)       | 6.2 (5.7-7.1)       | 0.73        |
| HbA1c, %-points, mean                                      | 6.7 (6.3-7.1)       | 6.6 (6.4-6.8)       | 6.6 (6.3-6.8)       | 0.28        |
| Treated, %                                                 | 69.4 (60.5-77.0)    | 73.2 (66.4-79.0)    | 70.6 (62.8-77.4)    | 0.83        |
| Insulin or oral medication use                             | 56.0 (45.6-66.0)    | 68.8 (61.9-74.9)    | 63.4 (55.6-70.5)    | 0.25        |
| Oral medication use only                                   | 13.3 (7.6-22.3)     | 4.4 (2.5-7.6)       | 7.2 (4.5-11.4)      | 0.09        |
| Any insulin use                                            | 66.1 (53.7-76.7)    | 74.3 (67.8-79.9)    | 77.2 (71.4-82.1)    | 0.05        |
| HbA1c <7.0 %-points (<53 mmol/mol), %                      | 69.4 (60.5-77.0)    | 73.2 (66.4-79.0)    | 70.6 (62.8-77.4)    | 0.83        |
| <b>Blood pressure</b>                                      |                     |                     |                     |             |
| Systolic blood pressure, mm Hg median                      | 130.0 (119.0-137.0) | 126.7(118.0-137.3)  | 124.0 (114.0-135.3) | 0.01        |
| Diastolic blood pressure, mm Hg, median                    | 78.0 (73.0-85.0)    | 72.7 (64.0-82.0)    | 72.0 (64.7-79.0)    | 0.001       |
| Systolic blood pressure, mm Hg, mean                       | 129.4 (126.3-132.5) | 129.1 (126.4-131.9) | 124.5 (122.5-126.6) | 0.01        |
| Diastolic blood pressure, mm Hg, mean                      | 78.1 (76.2-80.1)    | 71.2 (68.4-74.0)    | 71.3 (69.8-72.9)    | <0.001      |
| Treated, %                                                 | 38.2 (25.7-52.6)    | 55.7 (48.7-62.6)    | 53.5 (45.7-61.1)    | 0.09        |
| Hypertension (≥140/90 mm Hg or med use), %                 | 48.1 (35.4-61.1)    | 63.3 (56.2-69.8)    | 58.0 (50.0-65.6)    | 0.23        |
| Treated*                                                   | 79.4 (62.7-89.9)    | 87.2 (80.4-91.9)    | 92.2 (88.9-94.6)    | 0.05        |
| Treated and controlled (blood pressure<140/90 mm Hg) *     | 52.0 (34.5-69.0)    | 63.9 (54.8-72.0)    | 71.5 (63.9-78.0)    | 0.05        |
| Hypertension (≥130/80 mm Hg or med use), %                 | 70.4 (58.4-80.1)    | 74.3 (67.7-80.0)    | 67.4 (59.6-74.4)    | 0.72        |
| Treated*                                                   | 54.3 (37.4-70.3)    | 74.3 (66.4-80.9)    | 79.3 (72.0-85.1)    | 0.01        |
| Treated and controlled (blood pressure<130/80 mm Hg)*      | 11.0 (5.3-21.2)     | 30.5 (23.9-38.0)    | 38.9 (30.9-47.5)    | <0.001      |
| <b>Lipids</b>                                              |                     |                     |                     |             |
| Total cholesterol, mg/dl, median                           | 212.0 (187.0-246.0) | 192.0 (166.0-218.0) | 181.0 (153.0-208.0) | 0.004       |
| Total cholesterol, mg/dl, mean                             | 216.0 (206.9-225.0) | 196.3 (189.7-203.0) | 180.4 (176.2-184.6) | <0.001      |
| Treated, %                                                 | 15.7 (8.9-26.5)     | 33.8 (27.2-41.1)    | 43.0 (35.3-51.0)    | <0.001      |
| Hyperlipidemia (total cholesterol≥240 mg/dl or med use), % | 43.6 (32.6-55.3)    | 40.8 (34.3-47.7)    | 47.8 (40.4-55.3)    | 0.61        |
| Treated†                                                   | 32.6 (18.3-51.1)    | 74.6 (65.6-82.0)    | 88.3 (82.3-92.5)    | <0.001      |
| Treated and controlled (total cholesterol <240 mg/dl) †    | 23.6 (10.3-45.2)    | 53.4 (42.2-64.3)    | 71.6 (63.1-78.8)    | <0.001      |
| Hyperlipidemia (total cholesterol≥200 mg/dl or med use), % | 70.8 (61.7-78.4)    | 63.2 (57.4-68.7)    | 64.1 (58.2-69.7)    | 0.17        |
| Treated†                                                   | 20.7 (11.7-33.8)    | 50.8 (41.5-60.1)    | 66.3 (56.6-74.7)    | <0.001      |
| Treated and controlled (total cholesterol <200 mg/dl) †    | 14.0 (6.1-29.2)     | 32.7 (24.1-42.5)    | 51.9 (42.2-61.5)    | <0.001      |
| <b>All three risk factors controlled</b>                   |                     |                     |                     |             |

|                                                                                          |                  |                  |                  |        |
|------------------------------------------------------------------------------------------|------------------|------------------|------------------|--------|
| HbA1c<7.0% (<53 mmol/mol), blood pressure <130/80 mm Hg, total cholesterol <200 mg/dl, % | 11.5 (6.9-18.4)  | 19.8 (14.8-26.0) | 37.5 (29.6-46.0) | <0.001 |
| HbA1c<7.0% (<53 mmol/mol), blood pressure <140/90 mm Hg, total cholesterol <240 mg/dl, % | 36.2 (25.7-48.3) | 53.6 (45.9-61.1) | 64.0 (58.4-69.3) | <0.001 |

Abbreviations: NHANES, National Health and Nutrition Examination Survey.

Figures are presented as percentages or means (with 95% confidence intervals) or median (with interquartile range).

\* Computed for those with hypertension.

† Computed for those with hyperlipidemia.

Supplemental Table S6: Trends in the prevalence of complications (extended outcomes) among US adults with newly diagnosed diabetes (diagnosed within the past year), NHANES 1988-2018

|                                                                           | 1988-1994        | 1999-2008        | 2009-2018        | P for trend |
|---------------------------------------------------------------------------|------------------|------------------|------------------|-------------|
| Any chronic kidney disease                                                | 39.6 (30.0-50.1) | 26.8 (21.1-33.4) | 23.4 (18.6-29.1) | 0.007       |
| Percentage of chronic kidney cases treated with ACE-I/ARB                 | 11.4 (4.8-24.8)  | 53.1 (39.1-66.6) | 63.4 (51.1-74.2) | <0.001      |
| Albuminuria (albumin-to-creatinine ratio $\geq$ 30 mg/g)                  | 37.9 (28.7-48.1) | 19.9 (14.7-26.3) | 17.1 (12.8-22.4) | <0.001      |
| Percentage of albuminuria cases treated with ACE-I/ARB                    | 9.2 (3.4-22.4)   | 46.1 (31.2-61.6) | 64.5 (51.7-75.5) | <0.001      |
| Reduced eGFR (eGFR<60 ml/mi/1.73 m <sup>2</sup> )                         | 5.5 (2.7-10.9)   | 9.9 (6.6-14.8)   | 9.8 (6.5-14.4)   | 0.16        |
| Percentage of reduced eGFR cases treated with ACE-I/ARB                   | 35.2 (9.1-74.7)  | 70.5 (49.2-85.5) | 63.7 (42.5-80.7) | 0.22        |
| Retinopathy ( $\geq$ 1 retinal microaneurysms or blot hemorrhages)*       | 8.5 (3.7-18.2)   | 7.2 (2.8-17.1)   | -                | 0.77        |
| Any lower extremity disease <sup>†</sup>                                  | -                | 22.1 (15.7-30.3) | -                | -           |
| Peripheral neuropathy ( $\geq$ 1 insensate area via monofilament testing) | -                | 15.4 (9.7-23.5)  | -                | -           |
| Peripheral artery disease (ankle-brachial-index<0.9)                      | -                | 8.1 (4.6-13.8)   | -                | -           |
| Self-reported foot or leg ulcer                                           | -                | 5.8 (2.0-15.7)   | -                | -           |
| Any self-reported cardiovascular disease                                  | 22.1 (14.6-31.9) | 13.9 (10.4-18.3) | 20.4 (15.0-27.2) | 0.83        |
| History of congestive heart failure                                       | 8.5 (4.5-15.6)   | 5.0 (3.0-8.1)    | 5.5 (3.2-9.5)    | 0.21        |
| History of stroke                                                         | 9.1 (4.5-17.7)   | 7.0 (4.5-10.6)   | 6.9 (4.3-10.9)   | 0.49        |
| History of heart attack                                                   | 10.0 (5.2-18.4)  | 6.9 (4.5-10.3)   | 13.0 (8.6-19.2)  | 0.42        |

Abbreviations: NHANES, National Health and Nutrition Examination Survey.

Figures are presented as percentages (with 95% confidence intervals).

\* Retinopathy data were only available for adults aged 40+ during the 1988-1994 and 2005-2008 NHANES survey cycles.

<sup>†</sup> Lower- extremity disease data were only available for adults aged 40+ during the 1999-2004 NHANES survey cycles.
